# Supplementary material for: Interannual land cover and vegetation variability based on remote sensing data in the HTESSEL land surface model: implementation and effects on simulated water dynamics
Source: Copernicus journal article supplement (doi:10.5194/esd-14-1239-2023), 2023-11-29
Supplement: Supplementary file 1 [file esd-14-1239-2023-supplement.pdf]

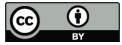

*Supplement of*

**Interannual land cover and vegetation variability based on remote sensing data in the HTESSEL land surface model: implementation and effects on simulated water dynamics**

**Fransje van Oorschot et al.**

*Correspondence to:* Fransje van Oorschot (f.vanoorschot@tudelft.nl)

The copyright of individual parts of the supplement might differ from the article licence.

## Supplementary material

### 1. Experimental setup

| Experiment | Spin-up 1993-1999                  |                                       |                       | Evaluation 1999-2019               |                                       |                       |
|------------|------------------------------------|---------------------------------------|-----------------------|------------------------------------|---------------------------------------|-----------------------|
|            | LC                                 | LAI                                   | FCover                | LC                                 | LAI                                   | FCover                |
| CTR        | ESA-CCI 1993                       | CGLS climatology 1993-2019            | k=0.5                 | ESA-CCI 1993                       | CGLS climatology 1993-2019            | k=0.5                 |
| IALC       | ESA-CCI annually varying 1993-2019 | CGLS climatology 1993-2019            | k=0.5                 | ESA-CCI annually varying 1993-2019 | CGLS climatology 1993-2019            | k=0.5                 |
| IAK5       | ESA-CCI annually varying 1993-2019 | CGLS inter-annually varying 1993-2019 | k=0.5                 | ESA-CCI annually varying 1993-2019 | CGLS inter-annually varying 1993-2019 | k=0.5                 |
| IAKV       | ESA-CCI annually varying 1993-2019 | CGLS inter-annually varying 1993-2019 | k vegetation specific | ESA-CCI annually varying 1993-2019 | CGLS inter-annually varying 1993-2019 | k vegetation specific |

Table S 1. Details of offline model experiments

### 2. Land Cover

| Case         | E CTR | E IALC | E DOLCEv3 | Et CTR | Et IALC | Es CTR | Es IALC | Ei CTR | Ei IALC |
|--------------|-------|--------|-----------|--------|---------|--------|---------|--------|---------|
| Amazon       | 1174  | 1162   | 1160      | 633    | 615     | 156    | 183     | 384    | 363     |
| Lapland      | 202   | 206    | 252       | 43     | 49      | 116    | 112     | 39     | 41      |
| Central Asia | 279   | 280    | 287       | 29     | 30      | 222    | 220     | 13     | 13      |

Table S 2. Annual mean (2014-2018) evaporation fluxes (mm/year) with E total evaporation, Et transpiration, Es soil evaporation and Ei interception evaporation in experiments CTR and IALC and DOLCEv3 (only E) for the three cases highlighted in Fig. 3

| Case         | r E CTR | r E IALC | RMSE E CTR | RMSE E IALC | r SMs CTR | r SMs IALC | RMSE SMs CTR | RMSE SMs IALC |
|--------------|---------|----------|------------|-------------|-----------|------------|--------------|---------------|
| Amazon       | 0.64    | 0.64     | 0.43       | 0.44        | 0.059     | 0.056      | 1.01         | 1.01          |
| Lapland      | 0.56    | 0.56     | 0.28       | 0.27        | 0.034     | 0.034      | 1.33         | 1.33          |
| Central Asia | 0.76    | 0.76     | 0.33       | 0.33        | 0.24      | 0.24       | 0.81         | 0.81          |

Table S 3 Pearson correlation values (r) and root mean squared error (RMSE) of model monthly evaporation with respect to DOLCEv3 evaporation, and near-surface soil moisture with respect to ESA-CCI SM. For r inter-annual anomalies are used, for RMSE E the monthly values, and for RMSE SMs the standardized inter-annual anomalies. The cases are highlighted in Fig. 3, S1-S3

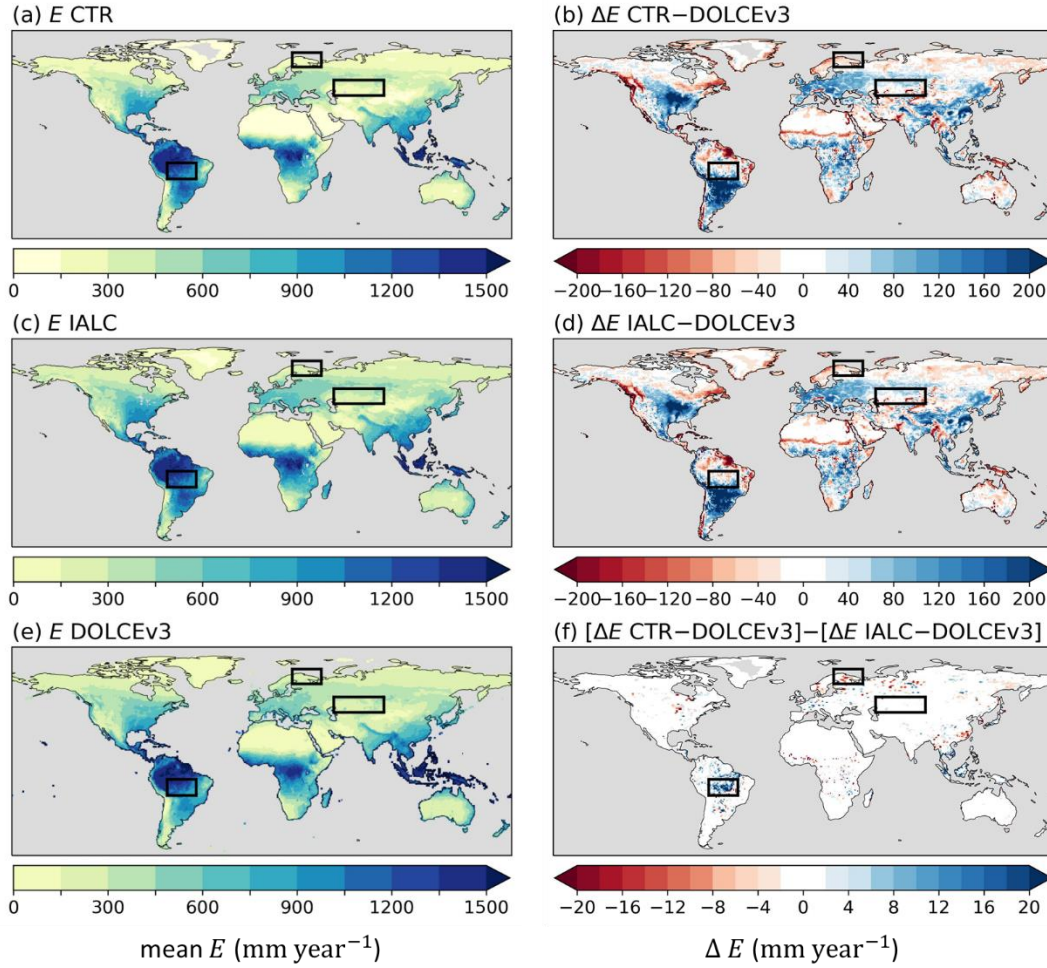

Figure S 1. Mean evaporation ( $E$ ) for (a) CTR, (c) IALC and (e) DOLCEv3 for 2014-2018. (b) and (d) show the absolute difference of mean  $E$  between CTR and DOLCEv3, and IALC and DOLCEv3. (f) is the difference between (b) and (d).

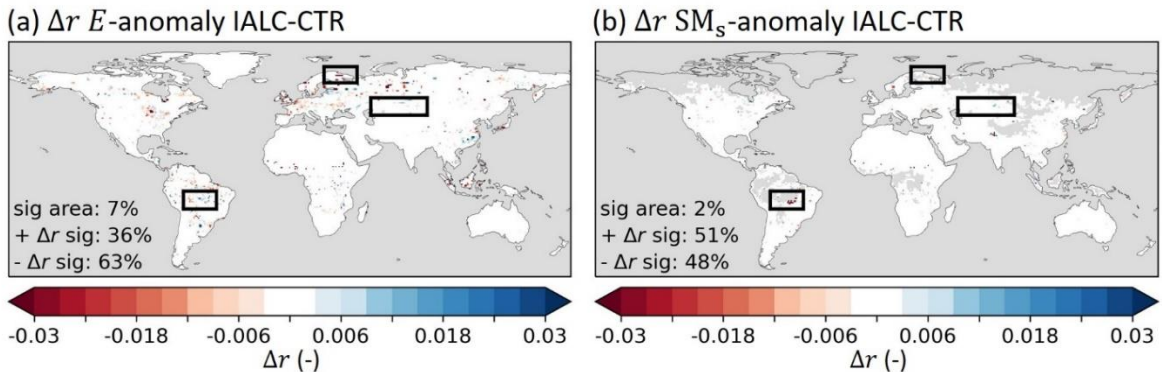

Figure S 2. Pearson correlation difference between experiment CTR and IALC (IALC-CTR) for (a) monthly anomaly total evaporation ( $E$ ) with respect to DOLCEv3 evaporation and (b) monthly anomaly surface soil moisture (SM<sub>s</sub>) with respect to ESA-CCI SM. Blue (red) indicates an increased (reduced) correlation in IALC compared to CTR, white indicates small and/or insignificant  $r$  differences, and grey indicates no data points. The percentages indicate the areal percentage of significantly changing land points, and the areal percentage of positive and negative  $\Delta r$  for significant points. The boxes highlight the three

regions Southern Amazon, Lapland and Central Asia with major land cover changes. See Table S1 for details of the experiments and Table S2 for values in the highlighted regions.

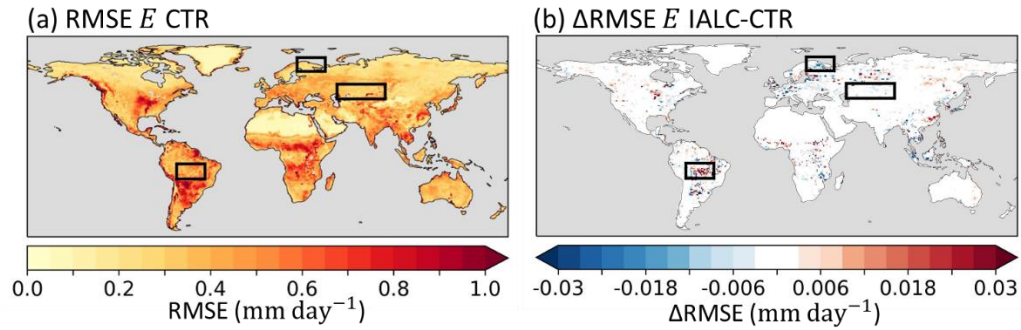

Figure S 3 (a) Root mean squared error (RMSE) of model monthly evaporation in experiment CTR with respect to DOLCEv3 with red indicating a larger RMSE. (b) The difference between RMSE in CTR and IALC (IALC–CTR) with blue (red) indicating a reduced (increased) RMSE. The boxes highlight the three regions Southern Amazon, Lapland and Central Asia with major land cover changes. See Table S1 for details of the experiments and Table S2 for values in the highlighted regions.

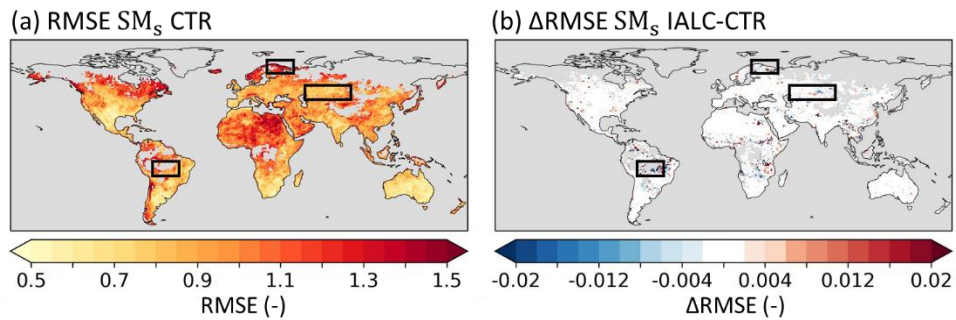

Figure S 4 (a) Root mean squared error (RMSE) of model monthly standardized anomalies of near-surface soil moisture (SMs) in experiment CTR with respect to ESA-CCI SM with red indicating a larger RMSE. (b) The difference between RMSE in CTR and IALC (IALC–CTR) with blue (red) indicating a reduced (increased) RMSE. The boxes highlight the three regions Southern Amazon, Lapland and Central Asia with major land cover changes. See Table S1 for details of the experiments and Table S2 for values in the highlighted regions.

### 3. LAI

(a) DJF E  $r$  IALC

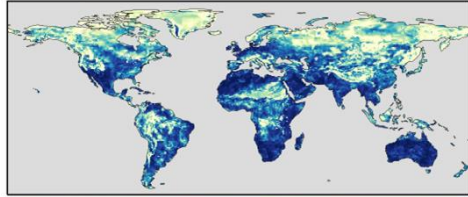

0.0 0.2 0.4 0.6 0.8 1.0

(c) MAM E  $r$  IALC

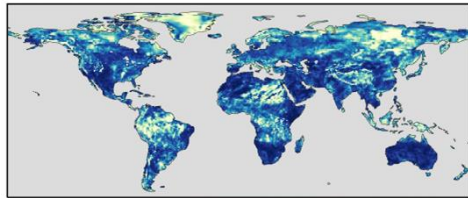

0.0 0.2 0.4 0.6 0.8 1.0

(e) JJA E  $r$  IALC

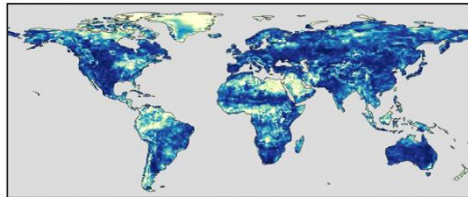

0.0 0.2 0.4 0.6 0.8 1.0

(g) SON E  $r$  IALC

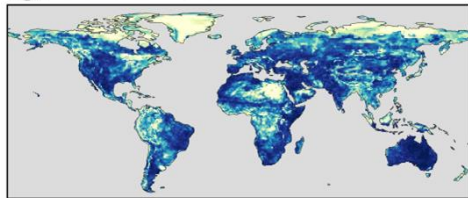

0.0 0.2 0.4 0.6 0.8 1.0  
 $r$  (-)

(b) DJF E  $\Delta r$  IAK5-IALC

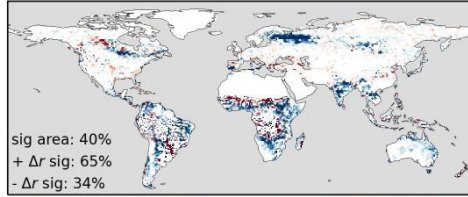

-0.05 -0.03 -0.01 0.01 0.03 0.05

(d) MAM E  $\Delta r$  IAK5-IALC

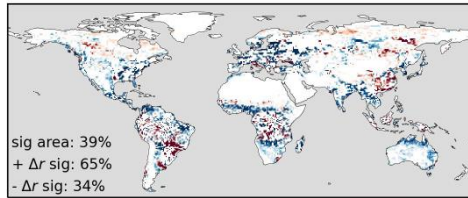

-0.05 -0.03 -0.01 0.01 0.03 0.05

(f) JJA E  $\Delta r$  IAK5-IALC

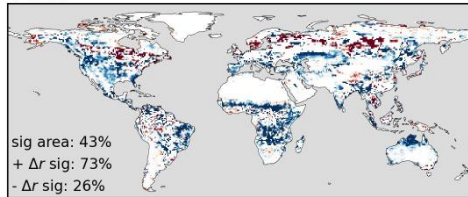

-0.05 -0.03 -0.01 0.01 0.03 0.05

(h) SON E  $\Delta r$  IAK5-IALC

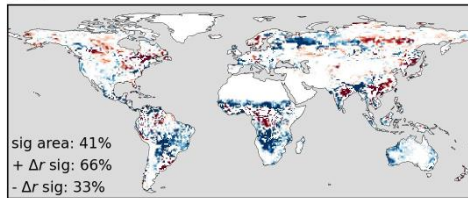

-0.05 -0.03 -0.01 0.01 0.03 0.05  
 $\Delta r$  (-)

Figure S 5. (a,c,e,g) Pearson correlation of seasonal anomaly evaporation (E) with respect to DOLCEv3 evaporation in IALC and (b,d,f,h) seasonal correlation difference between IALC and IAK5 (IAK5-IALC). Blue (red) indicates an increased (reduced) correlation in IAK5 compared to IALC, white colors indicate small and/or insignificant differences, and grey indicates no data points. The percentages indicate the areal percentage of significantly changing land points, and the areal percentage of positive and negative  $\Delta r$  for significant points. See Table S1 for details of the experiments.



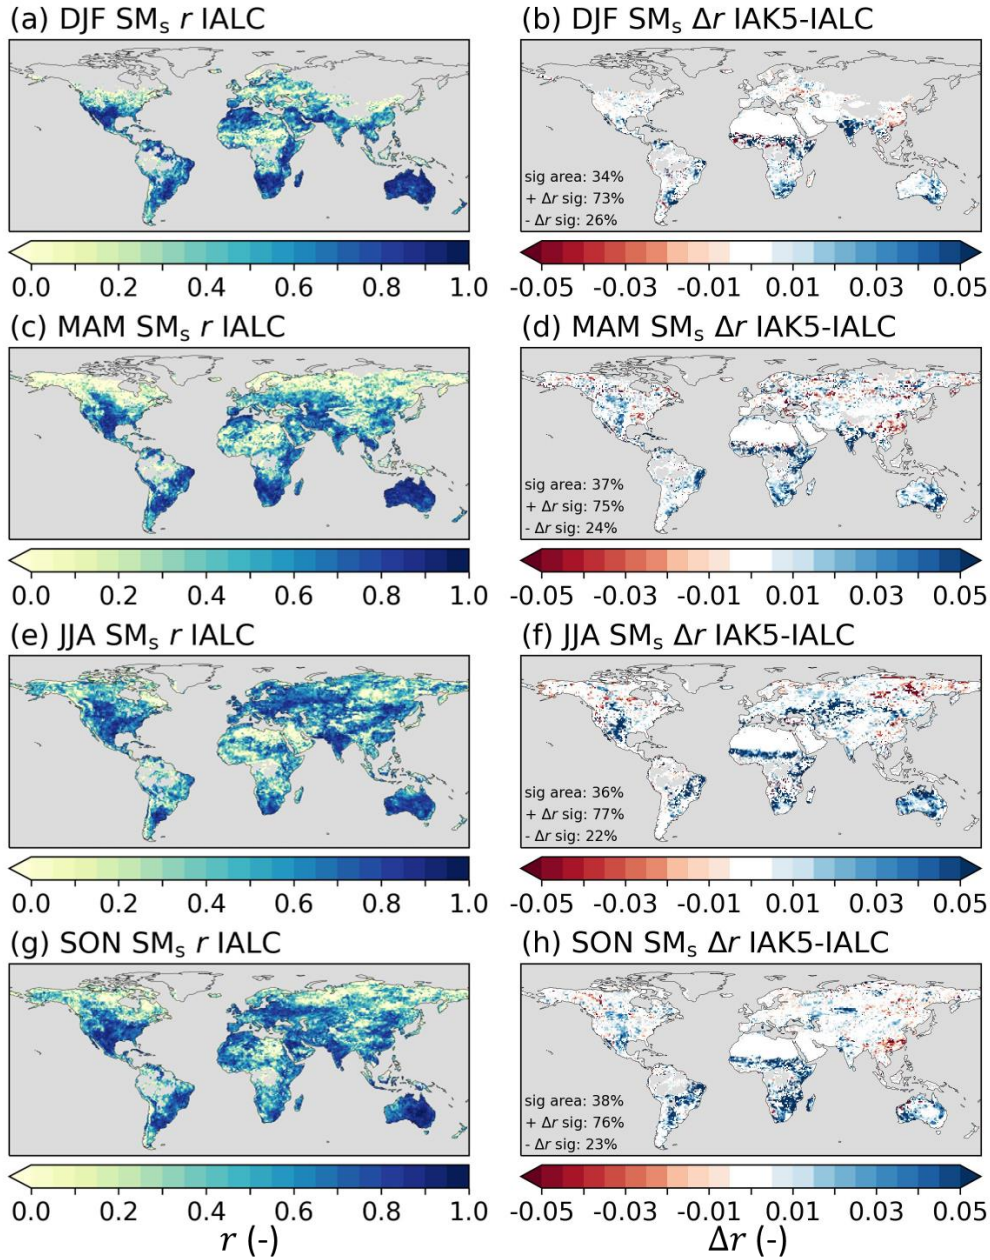

Figure S 6. (a,c,e,g) Pearson correlation of seasonal anomaly surface soil moisture (SMs) with respect to ESA-CCI SM in IALC and (b,d,f,h) seasonal correlation difference between IALC and IAK5 (IAK5-IALC). Blue (red) indicates an increased (reduced) correlation in IAK5 compared to IALC, white colors indicate small and/or insignificant differences, and grey indicates no data points. The percentages indicate the areal percentage of significantly changing land points, and the areal percentage of positive and negative  $\Delta r$  for significant points. See Table S1 for details of the experiments.

#### 4. Effective vegetation cover

| <b>Vegetation type</b>     | <b>k IAK5</b> | <b>RMSE k IAK5</b> | <b>k IAKV</b> | <b>RMSE k IAKV</b> |
|----------------------------|---------------|--------------------|---------------|--------------------|
| Crops                      | 0.5           | 0.042              | 0.458         | 0.036              |
| Short grass                | 0.5           | 0.031              | 0.457         | 0.026              |
| Evergreen Needleleaf trees | 0.5           | 0.098              | 0.351         | 0.038              |
| Deciduous needleleaf trees | 0.5           | 0.069              | 0.381         | 0.032              |
| Deciduous broadleaf trees  | 0.5           | 0.081              | 0.396         | 0.053              |
| Evergreen Broadleaf trees  | 0.5           | 0.066              | 0.390         | 0.036              |
| Tundra                     | 0.5           | 0.028              | 0.375         | 0.018              |
| Bogs and marshes           | 0.5           | 0.070              | 0.419         | 0.049              |
| Evergreen shrubs           | 0.5           | 0.060              | 0.438         | 0.045              |
| Deciduous shrubs           | 0.5           | 0.037              | 0.448         | 0.026              |

Table S 3. Effective vegetation cover k-values for experiments IAK5 and IAKV, with associated RMSE values with respect to the FCover data. Figures associated with the numbers are presented in Fig. 10.

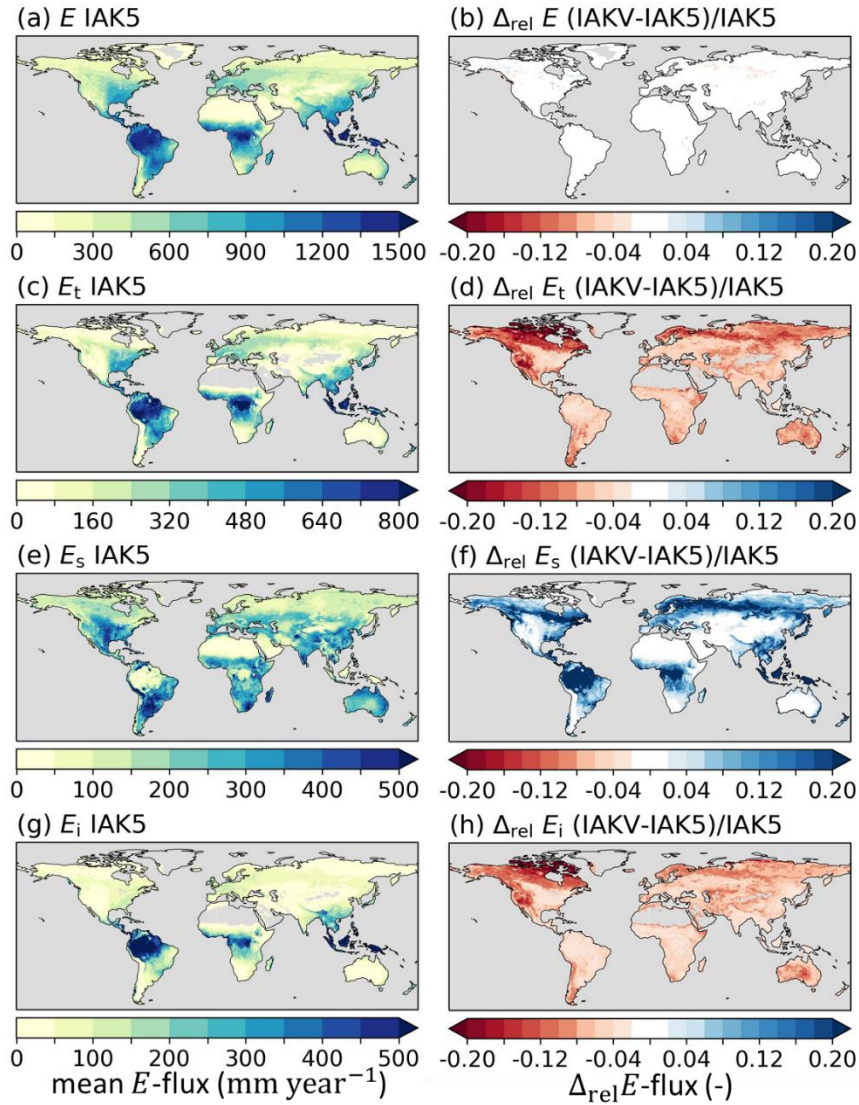

Figure S 7. Annual mean evaporation fluxes in experiment IAK5 with (a) total evaporation ( $E$ ), (c) transpiration ( $E_t$ ), (e) soil evaporation ( $E_s$ ) and (g) interception evaporation ( $E_i$ ) and the relative difference between annual mean evaporation fluxes in experiment IAKV and IAK5 ( $(IAKV - IAK5) / IAK5$ ) for (b)  $E$ , (d)  $E_t$ , (f)  $E_s$  and (h)  $E_i$ . Blue (red) indicates an increased (reduced) flux. Grey land areas indicate regions with annual mean  $E$ -fluxes < 0.1 mm/year. See Table S1 for details of the experiments.



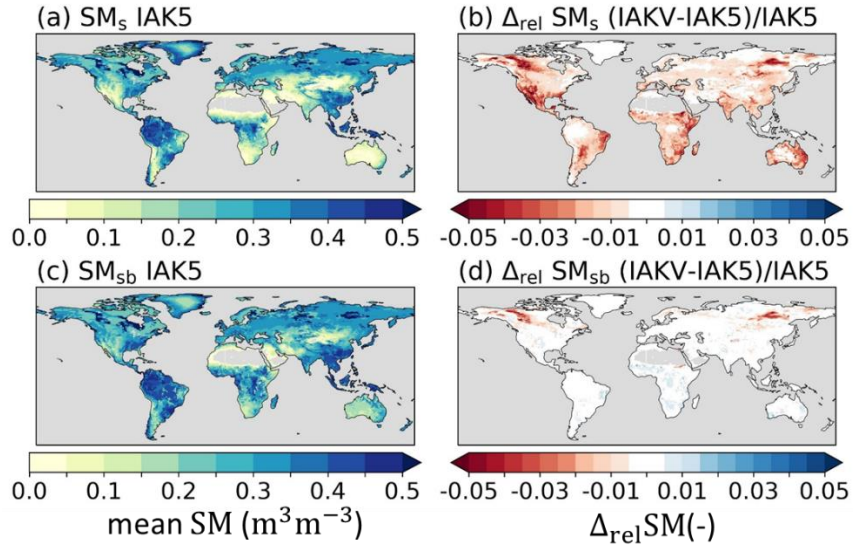

Figure S 8 Annual mean soil moisture in experiment IAK5 with (a) near-surface soil moisture (SMs) and (c) subsurface soil moisture (SMsb) and the relative difference between annual mean SM in experiment IAKV and IAK5  $((IAKV-IAK5)/IAK5)$  for (b) SMs and (d) SMsb. Blue (red) indicates an increased (reduced) soil moisture. Grey land areas indicate regions with annual mean SM < 0.01  $m^3/m^3$ . See Table S1 for details of the experiments.

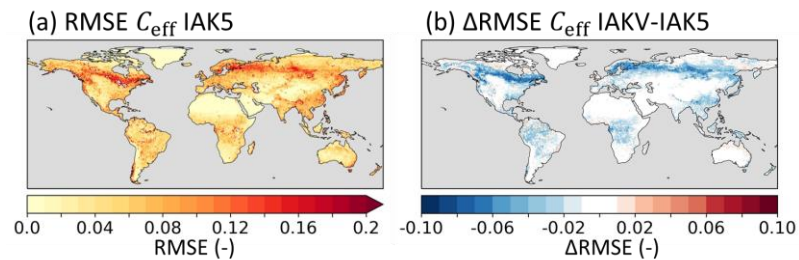

Figure S 9 (a) Root mean squared error (RMSE) of model monthly effective vegetation cover  $C_{eff}$  in experiment IAK5 with respect to CGLS FCover with red indicating a larger RMSE. (b) The difference between RMSE in IAK5 and IAKV (IAKV-IAK5) with blue (red) indicating a reduced (increased) RMSE. See Table S1 for details of the experiments.

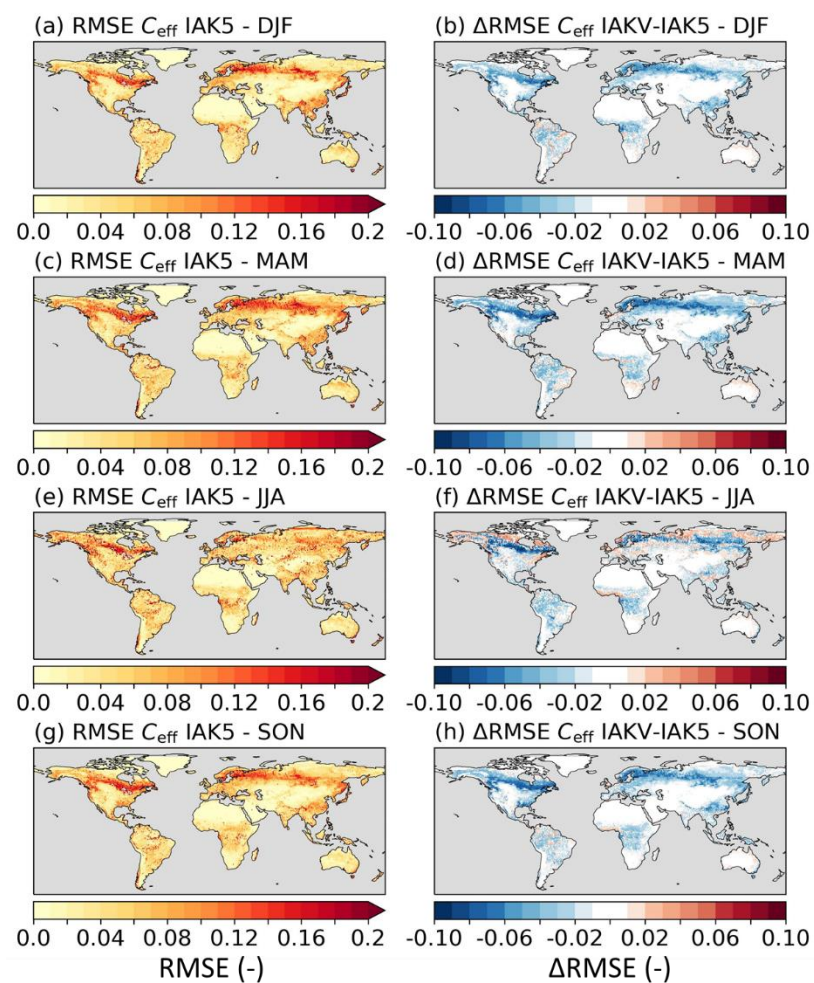

Figure S 10. Same as Fig. S8 for seasonal values

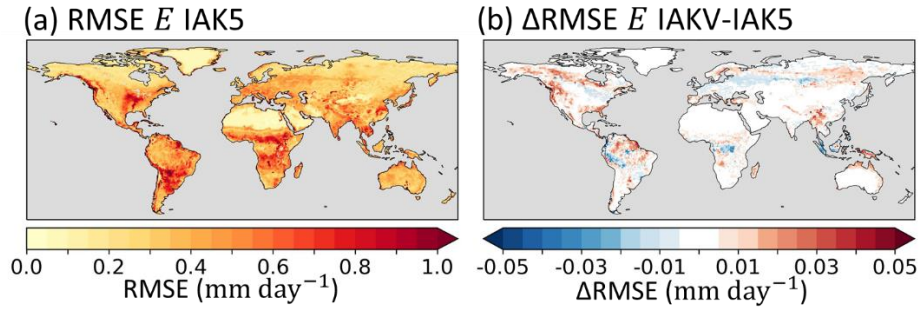

Figure S 11 (a) Root mean squared error (RMSE) of model monthly evaporation  $E$  in experiment IAK5 with respect to DOLCEv3  $E$  with red indicating a larger RMSE. (b) The difference between RMSE in IAK5 and IAKV (IAKV-IAK5) with blue (red) indicating a reduced (increased) RMSE. See Table S1 for details of the experiments.

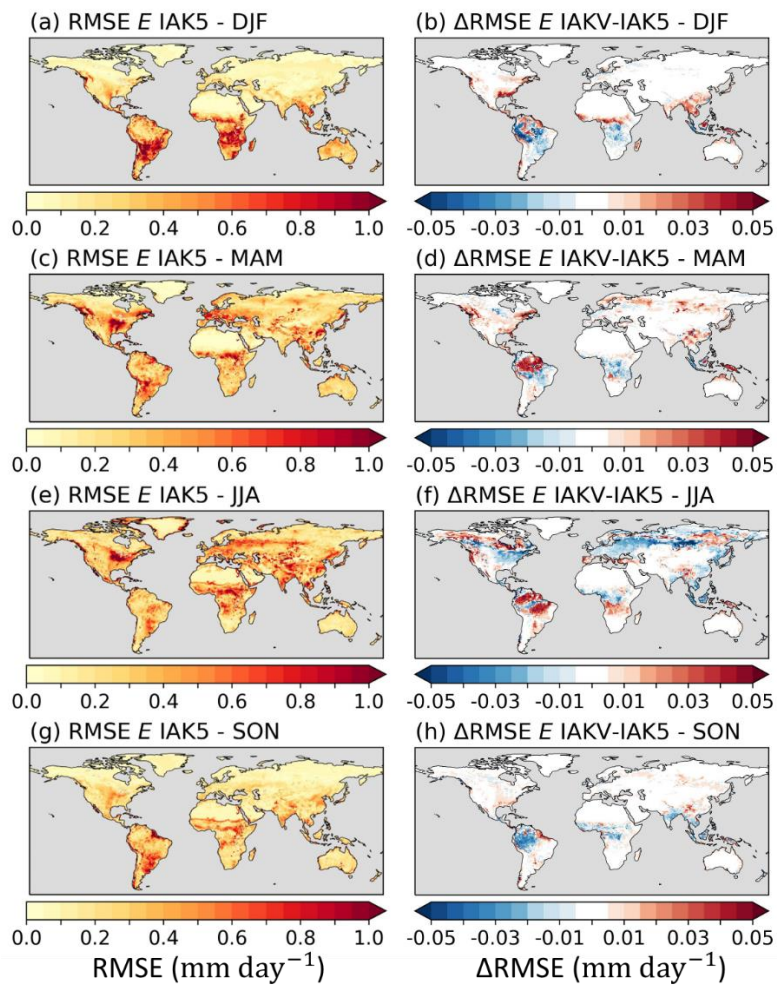

Figure S 12 Same as Fig. S10 for seasonal values

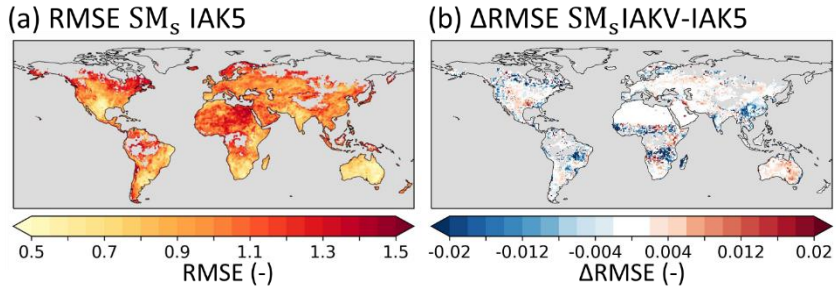

Figure S 13 (a) Root mean squared error (RMSE) of model monthly standardized anomalies of near-surface soil moisture in experiment IAK5 with respect to ESA-CCI SM with red indicating a larger RMSE. (b) The difference between RMSE in IAK5 and IAKV (IAKV-IAK5) with blue (red) indicating a reduced (increased) RMSE. See Table S1 for details of the experiments.

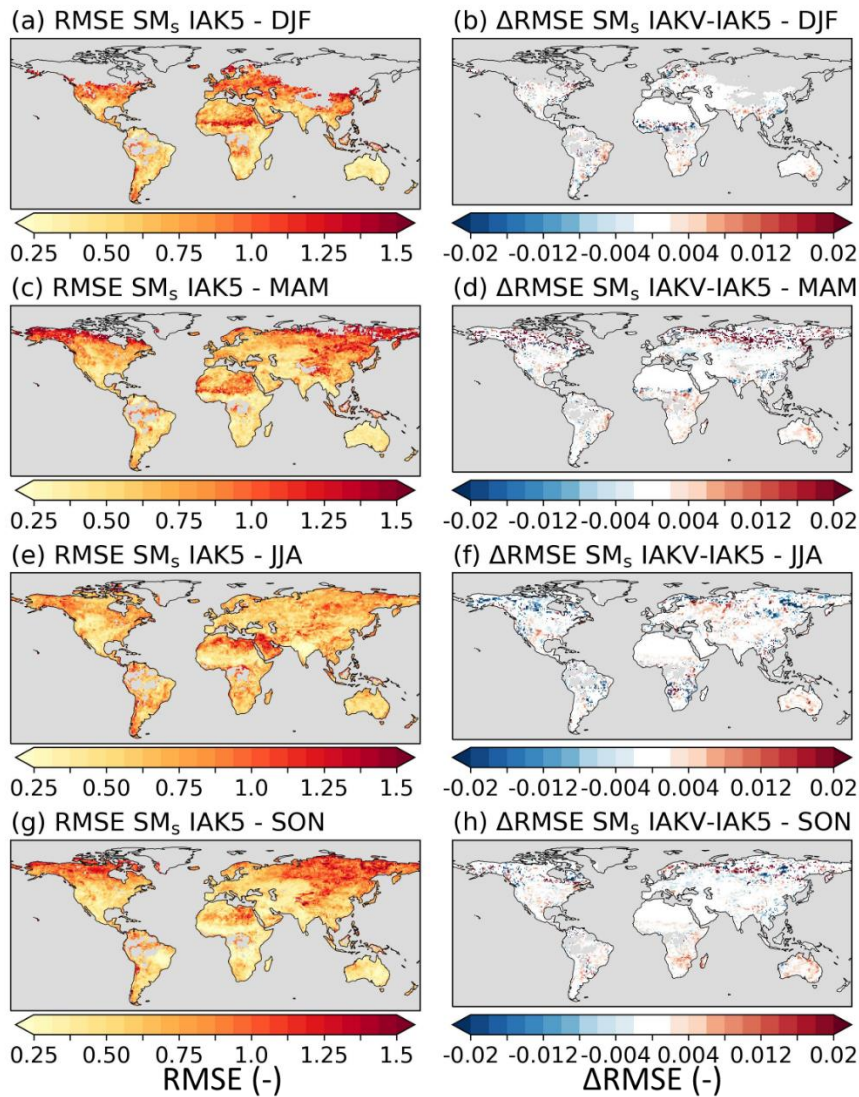

Figure S 14 Same as Fig. S12 for seasonal values



(a)  $\Delta r$   $E$ -anomaly IAKV-IAK5

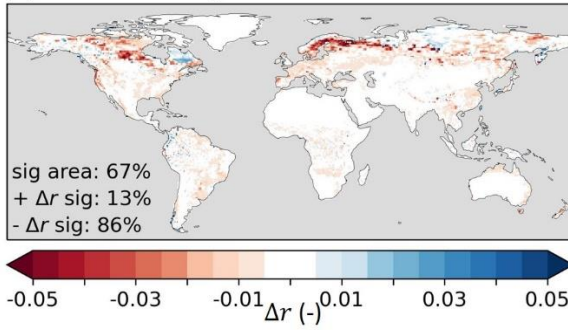

(b)  $\Delta r$   $SM_s$ -anomaly IAKV-IAK5

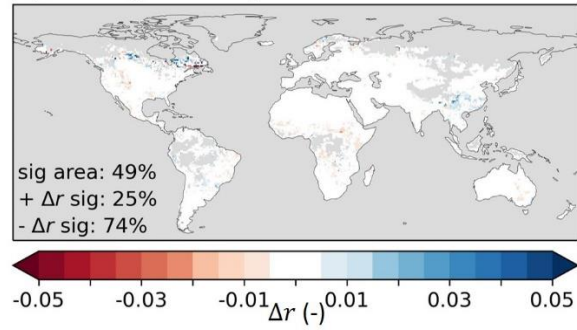

Figure S 15 Pearson correlation difference between experiment IAK5 and IAKV (IAKV-IAK5) for (a) monthly anomaly total evaporation ( $E$ ) with respect to DOLCEv3 evaporation and (b) monthly anomaly surface soil moisture ( $SM_s$ ) with respect to ESA-CCI SM. Blue (red) indicates an increased (reduced) correlation in IAKV compared to IAK5, white indicates small and/or insignificant  $r$  differences, and grey indicates no data points. The percentages indicate the areal percentage of significantly changing land points, and the areal percentage of positive and negative  $\Delta r$  for significant points. See Table S1 for details of the experiments.



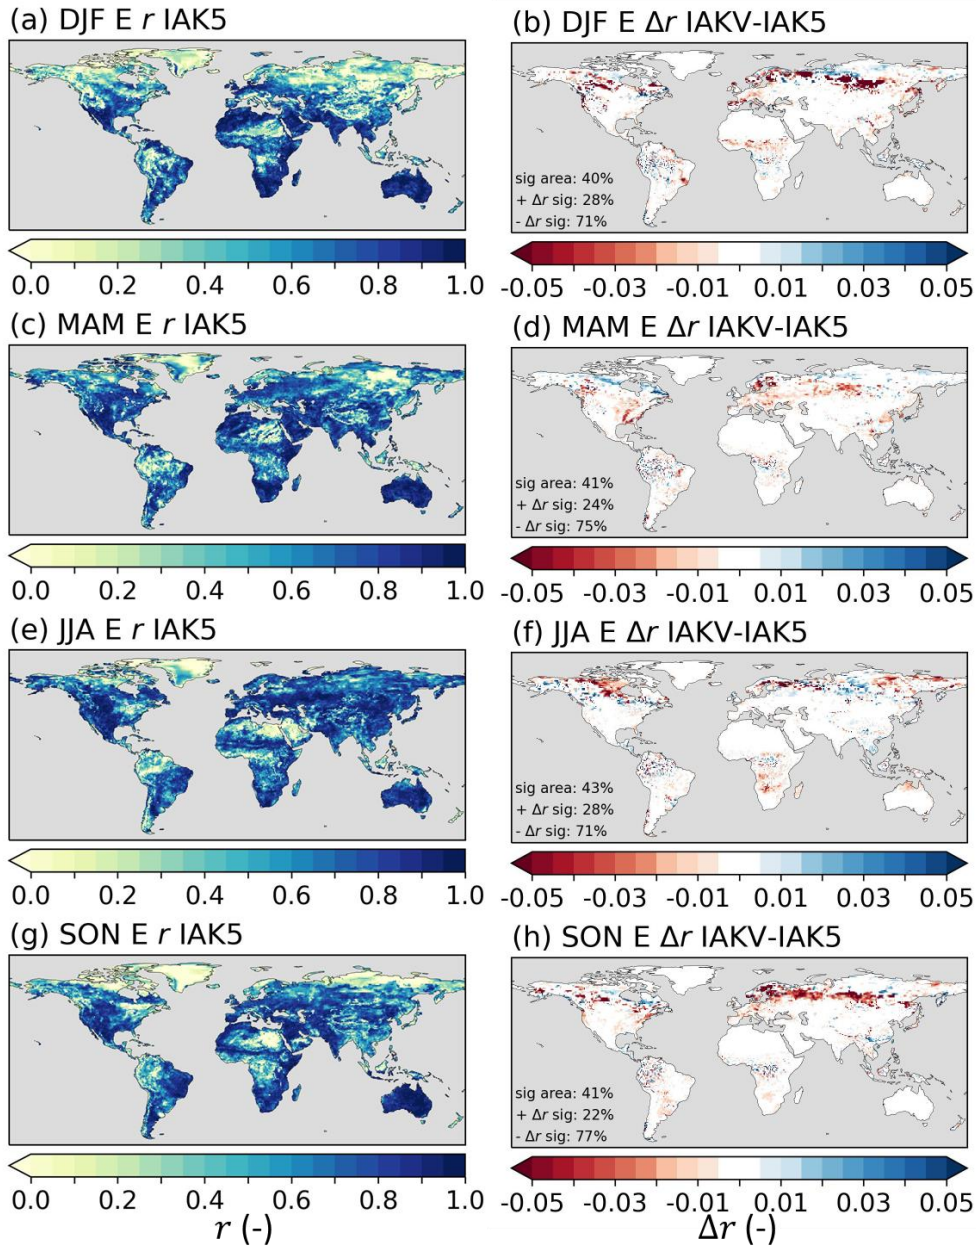

Figure S 16. (a,c,e,g) Pearson correlation of seasonal anomaly evaporation (E) with respect to DOLCEv3 evaporation in IAK5 and (b,d,f,h) seasonal correlation difference between IAK5 and IAKV (IAKV-IAK5). Blue (red) indicates an increased (reduced) correlation in IAKV compared to IAK5, white colors indicate small and/or insignificant differences, and grey indicates no data points. The percentages indicate the areal percentage of significantly changing land points, and the areal percentage of positive and negative  $\Delta r$  for significant points. See Table S1 for details of the experiments.

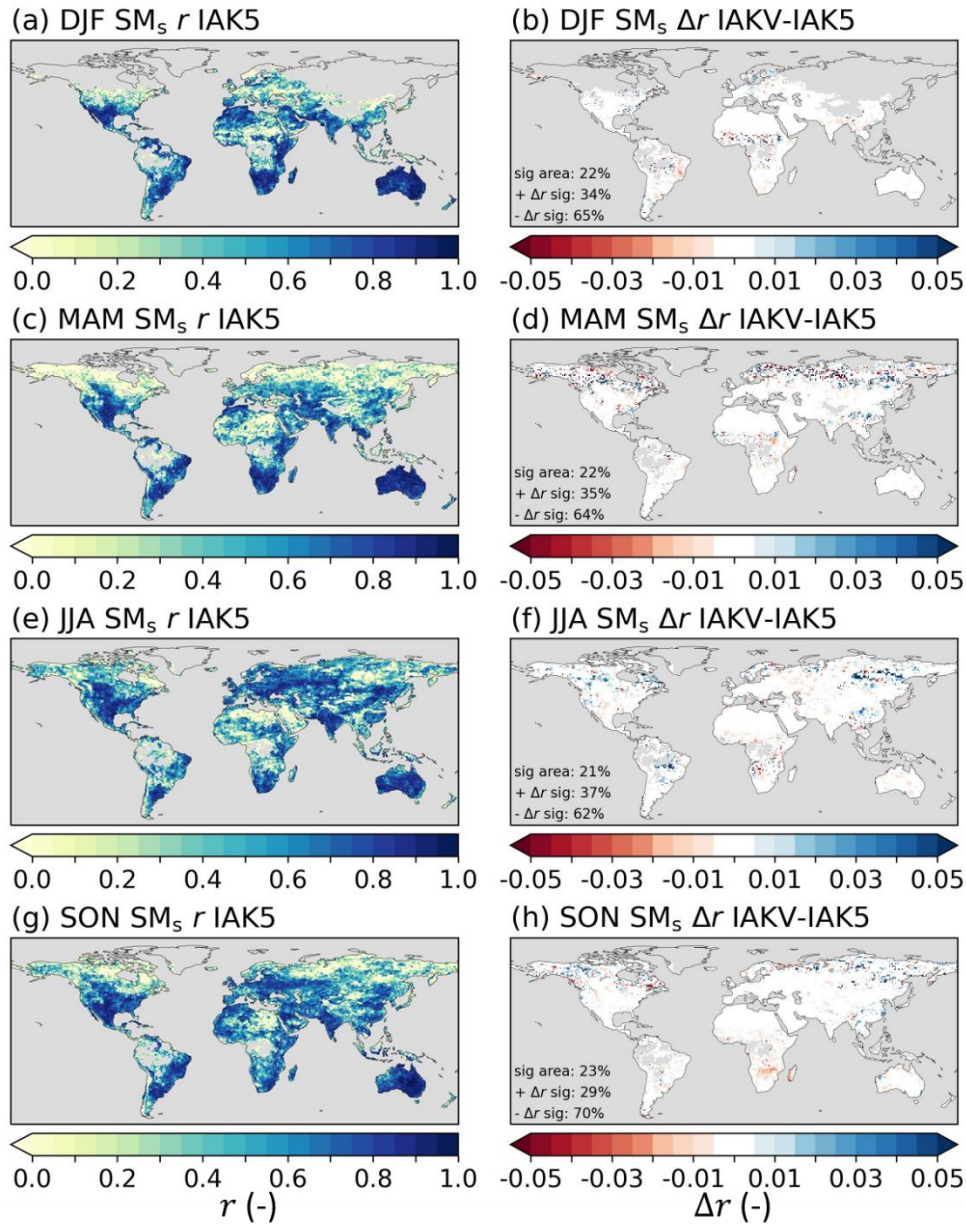

Figure S 17. (a,c,e,g) Pearson correlation of seasonal anomaly surface soil moisture (SMs) with respect to ESA-CCI SM in IAK5 and (b,d,f,h) seasonal correlation difference between IAKV and IAK5 (IAKV-IAK5). Blue (red) indicates an increased (reduced) correlation in IAKV compared to IAK5, white colors indicate small and/or insignificant differences, and grey indicates no data points. The percentages indicate the areal percentage of significantly changing land points, and the areal percentage of positive and negative  $\Delta r$  for significant points. See Table S1 for details of the experiments.

## 6. LC + LAI + effective vegetation cover

(a)  $\Delta r$   $E$ -anomaly IAKV-CTR

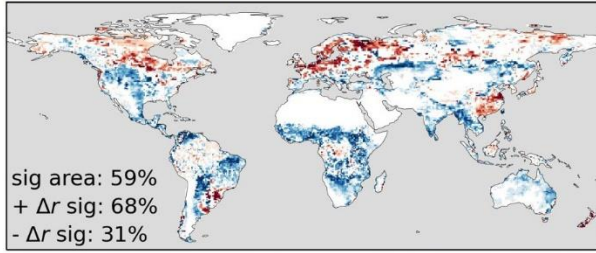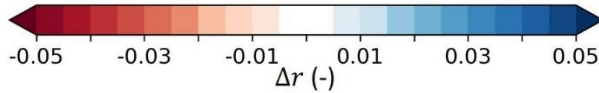

(b)  $\Delta r$   $SM_s$ -anomaly IAKV-CTR

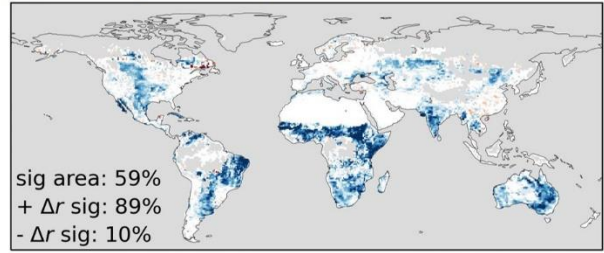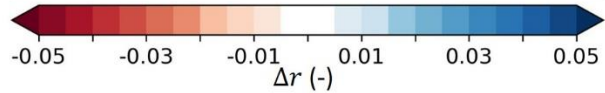

Figure S 18. Pearson correlation difference between experiment CTR and IAKV (IAKV-CTR) for (a) monthly anomaly total evaporation ( $E$ ) with respect to DOLCEv3 evaporation and (b) monthly anomaly surface soil moisture ( $SM_s$ ) with respect to ESA-CCI  $SM$ . Blue (red) indicates an increased (reduced) correlation in IAKV compared to CTR, white indicates small and/or insignificant  $r$  differences, and grey indicates no data points. The percentages indicate the areal percentage of significantly changing land points, and the areal percentage of positive and negative  $\Delta r$  for significant points. See Table S1 for details of the experiments.

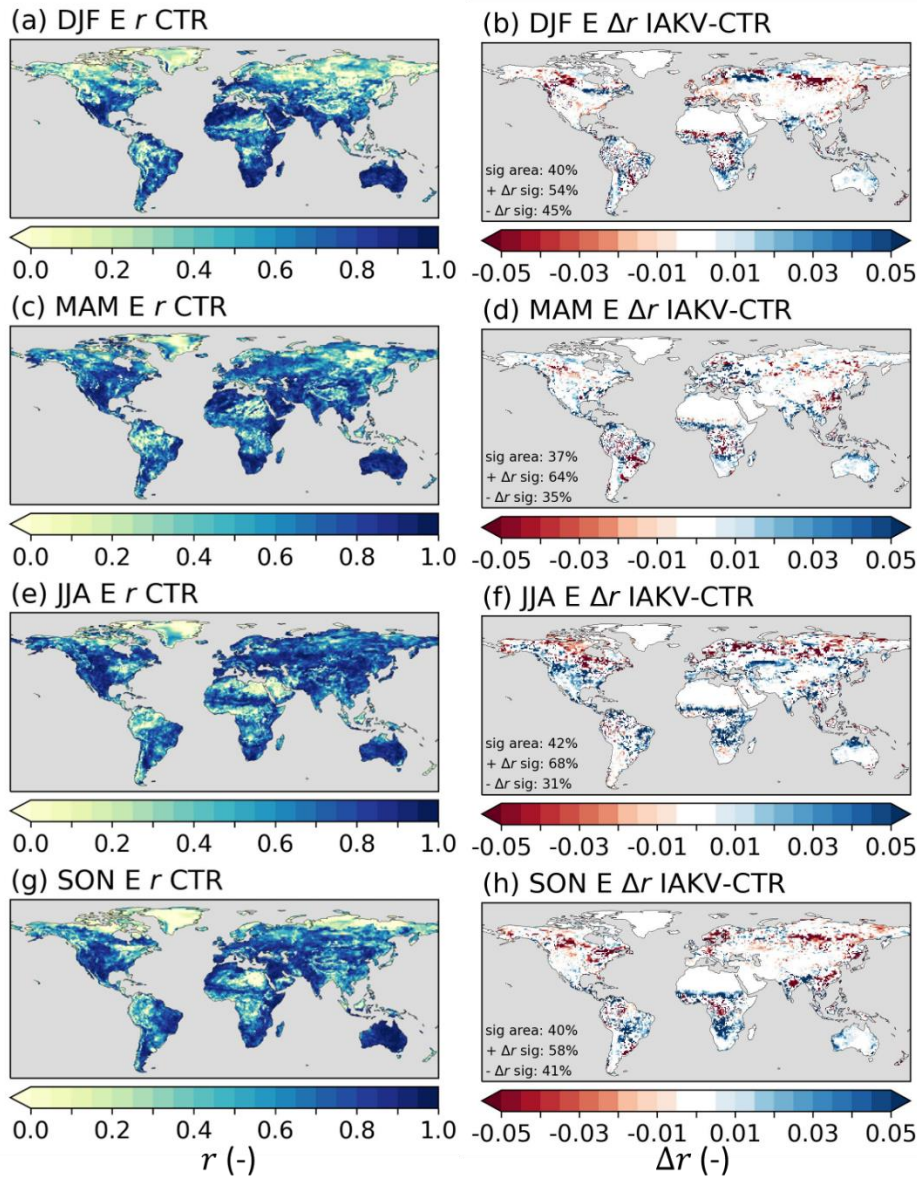

Figure S 19. (a,c,e,g) Pearson correlation of seasonal anomaly evaporation (E) with respect to DOLCEv3 evaporation in CTR and (b,d,f,h) seasonal correlation difference between CTR and IAKV (IAKV-CTR). Blue (red) indicates an increased (reduced) correlation in IAKV compared to CTR, white colors indicate small and/or insignificant differences, and grey indicates no data points. The percentages indicate the areal percentage of significantly changing land points, and the areal percentage of positive and negative  $\Delta r$  for significant points. See Table S1 for details of the experiments.



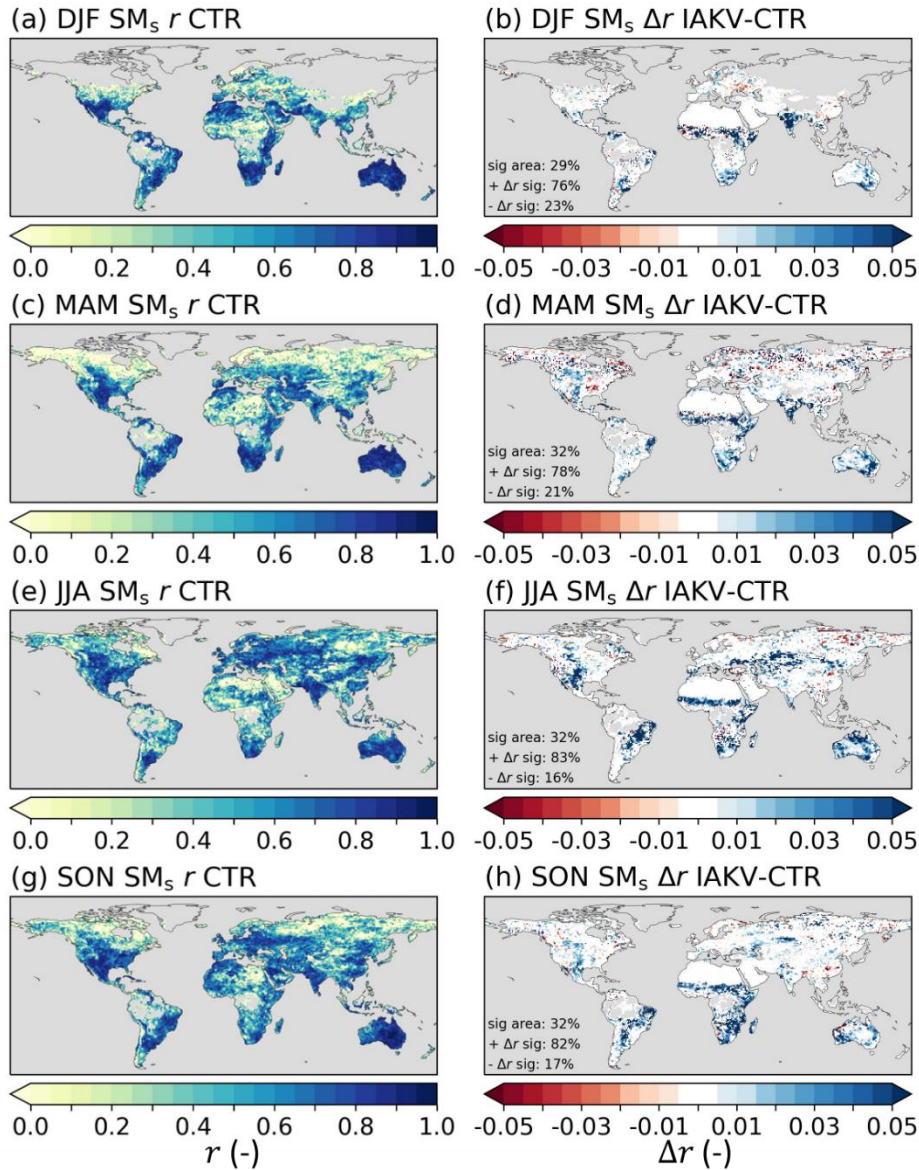

Figure S 20. (a,c,e,g) Pearson correlation of seasonal anomaly surface soil moisture (SMs) with respect to ESA-CCI SM in CTR and (b,d,f,h) seasonal correlation difference between CTR and IAKV (IAKV-CTR). Blue (red) indicates an increased (reduced) correlation in IAKV compared to CTR, white colors indicate small and/or insignificant differences, and grey indicates no data points. The percentages indicate the areal percentage of significantly changing land points, and the areal percentage of positive and negative  $\Delta r$  for significant points. See Table S1 for details of the experiments.
